| <b>AWBL*</b> | <b>AWCL</b>  | <b>AWBR*</b> | <b>AWCR</b>  |
|--------------|--------------|--------------|--------------|
| <b>AFDL</b>  | <b>ASHL*</b> | <b>AFDR</b>  | <b>ASHR*</b> |
| <b>ASKL</b>  | <b>ASIL*</b> | <b>ASIR*</b> | <b>AIMR</b>  |
| <b>ADFL</b>  | <b>PVQL</b>  | <b>ASKR</b>  | <b>AIYR</b>  |
| <b>ADLL</b>  | <b>AIML</b>  | <b>ADLR</b>  | <b>RICR</b>  |
| <b>BAGL</b>  | <b>AIYL</b>  | <b>PVQR</b>  | <b>PHAR</b>  |
| <b>BAGR</b>  | <b>AIZL</b>  | <b>ADFR</b>  | <b>PVCR</b>  |
|              | <b>ADAL</b>  | <b>AIZR</b>  |              |
|              | <b>RICL</b>  | <b>ADAR</b>  |              |
|              | <b>PHAL</b>  | <b>PHBR</b>  |              |
|              | <b>PHBL</b>  |              |              |
|              | <b>PVCL</b>  |              |              |

**Fig. S1. Lineage groups in the NSY-5 gap junction-dependent neural network.** *nsy-5* is expressed in both AWC neurons and at least 17 pairs of other sensory neurons and interneurons in the head and tail (Chuang et al., 2007). AWBL, AWCL, AWBR and AWCR cells represent four lineage groups within the NSY-5 network and express the co-injection mosaic marker *odr-1p::DsRed*. Fifteen out of the 34 non-AWC cells expressing *nsy-5* are closely related to either AWB by lineage. Asterisks indicate cells analyzed for generation of AWC<sup>ON</sup> side biases.

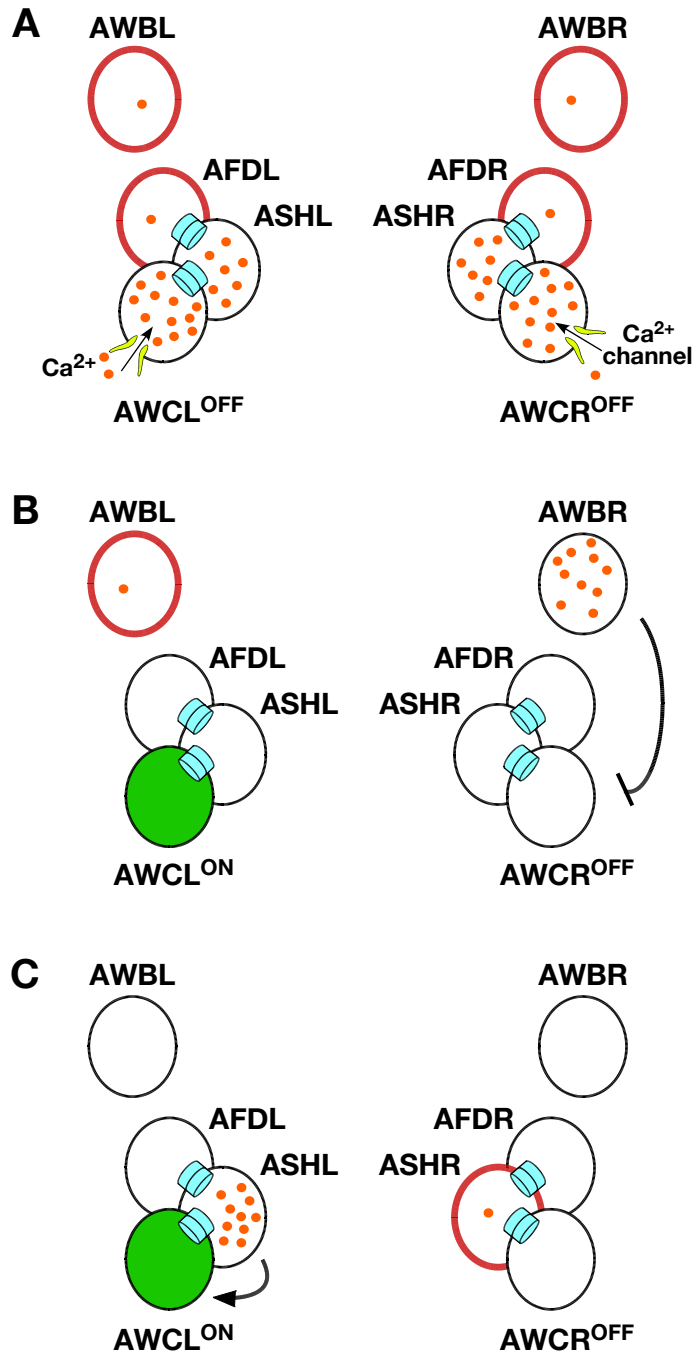

**Fig. S2. Schematic of key mosaic results.** (A) Intracellular calcium in non-AWCs of the NSY-5 network is required for  $AWC^{ON}$  induction. Mosaic animals that retain the *nsy-5p::calbindin D28K* array in both AWB lineages but neither AWC lineage have buffered calcium in about half of the population of non-AWCs in the NSY-5 network, leading to defective intercellular calcium signaling within the network required for  $AWC^{ON}$  induction. In the absence of proper calcium-based intercellular communication in the NSY-5 network, both AWC cells maintain endogenous high calcium levels via calcium influx through voltage-gated calcium channels and thus stay as the default  $AWC^{OFF}$  fate (see Table 1, row c). (B,C) Intracellular calcium levels in non-AWCs of the NSY-5 network generate side biases of  $AWC^{ON}$  induction by communicating with AWC via NSY-5 gap junctions. (B) Mosaic animals that retain the *str-1p::calbindin D28K* array in AWBL have higher calcium in AWBR, which inhibits AWCR from becoming  $AWC^{ON}$  (see Table 1, row o). (C) Mosaic animals that retain the *sra-6p::calbindin D28K::SL2::mCherry* array in ASHR have higher calcium in ASHL, which promotes AWCL to become  $AWC^{ON}$  (see Table 1, row v). AWB cells express *nsy-5*, but do not directly contact AWC. The influence from AWBR on AWCR may go through other cells in the NSY-5 network. Red cells indicate retention of calcium buffer transgenes. Blue cylinders indicate NSY-5 gap junctions.

**Table S1. Effects of mutants and transgenes on Ca<sup>2+</sup> level/signaling and AWC terminal fate**

| Genetic background    | Transgene                     | Cells expressing transgene | Effect on Ca <sup>2+</sup> level (signaling) | Effect on AWC terminal fate                                 |
|-----------------------|-------------------------------|----------------------------|----------------------------------------------|-------------------------------------------------------------|
| Wild type             | None                          |                            |                                              | 1 AWC <sup>ON</sup>                                         |
|                       | <i>odr-3p::calbindin D28K</i> | AWC                        | –                                            | 2 AWC <sup>ON</sup>                                         |
|                       | <i>odr-3p::parvalbumin</i>    | AWC                        | –                                            | 2 AWC <sup>ON</sup>                                         |
|                       | <i>odr-3p::calbindin D9K</i>  | AWC                        | –                                            | 2 AWC <sup>ON</sup>                                         |
|                       | <i>nsy-5p::calbindin D28K</i> | AWC, non-AWCs*             | –                                            | 2 AWC <sup>ON</sup> , low 2 AWC <sup>OFF</sup>              |
|                       | <i>nsy-5p::parvalbumin</i>    | AWC, non-AWCs*             | –                                            | 2 AWC <sup>ON</sup> , low 2 AWC <sup>OFF</sup>              |
|                       | <i>odr-3p::cmd-1</i>          | AWC                        | (+)                                          | 1 AWC <sup>ON</sup>                                         |
|                       | <i>str-1p::calbindin D28K</i> | AWB                        | –                                            | 1 AWC <sup>ON</sup> , bias AWC <sup>ON</sup> side in mosaic |
|                       | <i>sra-6p::calbindin D28K</i> | ASH, ASI                   | –                                            | 1 AWC <sup>ON</sup> , bias AWC <sup>ON</sup> side in mosaic |
| <i>unc-36(e251)</i>   | None                          |                            | –                                            | 2 AWC <sup>ON</sup>                                         |
| <i>unc-2(e55)</i>     | None                          |                            | –                                            | 2 AWC <sup>ON</sup> , low 2 AWC <sup>OFF</sup>              |
| <i>unc-2(zf35gf)</i>  | None                          |                            | +                                            | 1 AWC <sup>ON</sup>                                         |
|                       | <i>odr-3p::cmd-1</i>          | AWC                        | +(+)                                         | 2 AWC <sup>OFF</sup>                                        |
|                       | <i>odr-3p::calbindin D28K</i> | AWC                        | +–                                           | 2 AWC <sup>ON</sup>                                         |
| <i>unc-43(n498gf)</i> | None                          |                            | +                                            | 2 AWC <sup>OFF</sup>                                        |

+, positive effect; –, negative effect.

\*Non-AWCs are other 34 neurons that express *nsy-5* as listed in supplementary material Fig. S1.

**Table S2. mCherry expression in AWB and ASH does not affect AWC asymmetry**

| Transgene                   | mCherry cells |      | <i>str-2p::GFP</i> phenotype (%) |                    |                    |                    | <i>n</i> |
|-----------------------------|---------------|------|----------------------------------|--------------------|--------------------|--------------------|----------|
|                             | AWBL          | AWBR | 2AWC <sup>OFF</sup>              | AWCL <sup>ON</sup> | AWCR <sup>ON</sup> | 2AWC <sup>ON</sup> |          |
| <i>str-1p::mCherry</i>      | +             | +    | 1                                | 44                 | 55                 | 0                  | 446      |
|                             | +             | –    | 0                                | 47                 | 53                 | 0                  | 77       |
|                             | –             | +    | 0                                | 47                 | 53                 | 0                  | 57       |
| <i>sra-6p::SL2::mCherry</i> | ASHL          | ASHR |                                  |                    |                    |                    |          |
|                             | +             | +    | 1                                | 39                 | 60                 | 0                  | 293      |
|                             | +             | –    | 0                                | 41                 | 59                 | 0                  | 34       |
|                             | –             | +    | 0                                | 32                 | 68                 | 0                  | 31       |

**Table S3. IP3 and serotonin signaling mutants have wild-type AWC asymmetry**

| Genetic background                       | 1 AWC <sup>OFF</sup> /<br>1 AWC <sup>ON</sup> |                            |                            | <i>n</i> |
|------------------------------------------|-----------------------------------------------|----------------------------|----------------------------|----------|
|                                          | 2 AWC <sup>OFF</sup><br>(%)                   | 1 AWC <sup>ON</sup><br>(%) | 2 AWC <sup>ON</sup><br>(%) |          |
| Wild type                                | 1                                             | 99                         | 0                          | 110      |
| IP3 signaling mutants                    |                                               |                            |                            |          |
| IP3 receptor / <i>itr-1(sy331lf)</i> *   | 0                                             | 100                        | 0                          | 127      |
| IP3 kinase / <i>lfe-2(sy326lf)</i>       | 0                                             | 100                        | 0                          | 143      |
| 5-phosphatase / <i>ipp-5(sy605lf)</i>    | 1                                             | 99                         | 0                          | 139      |
| phospholipase C / <i>plc-3(tm1340lf)</i> | 1                                             | 99                         | 0                          | 117      |
| Serotonin mutants                        |                                               |                            |                            |          |
| <i>tph-1(mg280lf)</i>                    | 1                                             | 99                         | 0                          | 244      |

\*Like *itr-1(sy331)* mutants, *itr-1(sy290)*, *itr-1(sy291)*, *itr-1(sy327)* and *itr-1(sy328)* mutants had wild-type AWC asymmetry.
